# Supplementary figures and images for: Nickel catalysts bearing bidentate α-aminoaldimines for ethylene polymerization—independent and cooperative structure/reactivity relationship resulting from unsymmetric square planar coordination
Source: Royal Society of Chemistry journal article supplement (doi:10.1039/b814423k), 2009-01-01

SQUID Data for Ni-1c

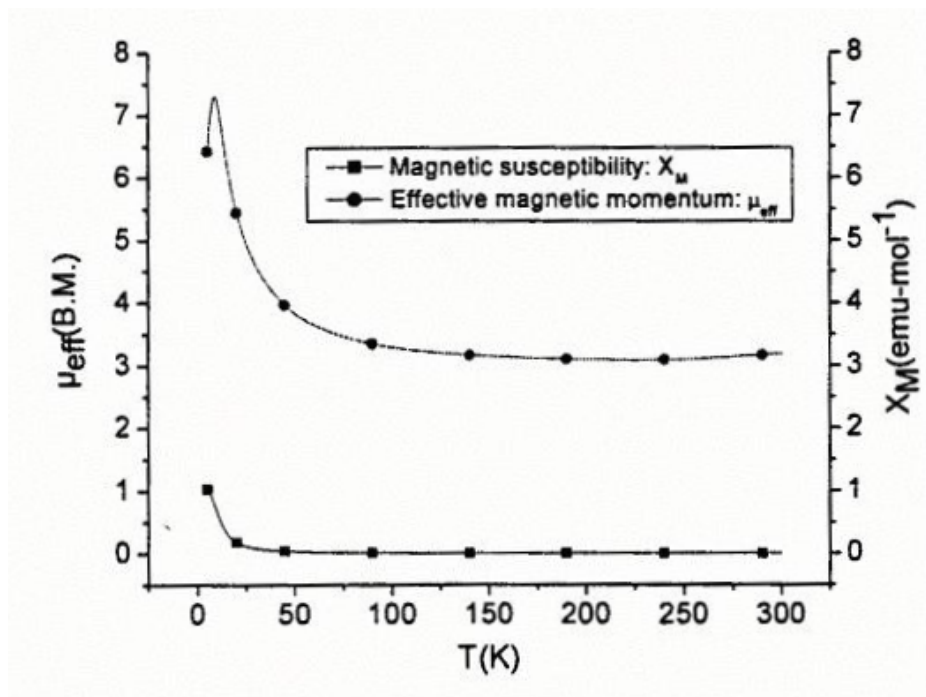

Supplement: b814423k.pdf [file b814423k.pdf]
